# Supplementary material
Source: Elsevier journal article supplement (https://comptes-rendus.academie-sciences.fr/chimie/article/10.1016/j.crci.2011.05.002/file/attach/mmc2.pdf)

# checkCIF/PLATON report

No syntax errors found. CIF dictionary Interpreting this report

## Datablock: ic11831

---

Bond precision: C-C = 0.0130 A Wavelength=0.71073

Cell: a=16.9785(9) b=22.6333(12) c=13.0677(7)  
alpha=90 beta=90.791(1) gamma=90

Temperature: 150 K

|                | Calculated                                | Reported                        |
|----------------|-------------------------------------------|---------------------------------|
| Volume         | 5021.2(5)                                 | 5021.2(5)                       |
| Space group    | C 2/m                                     | C2/m                            |
| Hall group     | -C 2y                                     | ?                               |
| Moiety formula | C88 H72 N16 Ni4 O8, F6 P,<br>4(C2 H3 Cl3) | ?                               |
| Sum formula    | C96 H84 Cl12 F6 N16 Ni4 O8<br>P           | C96 H84 Cl12 F6 N16 Ni4 O8<br>P |
| Mr             | 2394.92                                   | 2395.00                         |
| Dx,g cm-3      | 1.584                                     | 1.584                           |
| Z              | 2                                         | 2                               |
| Mu (mm-1)      | 1.150                                     | 1.150                           |
| F000           | 2442.0                                    | 2442.0                          |
| F000'          | 2449.28                                   |                                 |
| h,k,lmax       | 22,29,16                                  | 22,29,16                        |
| Nref           | 5912                                      | 5910                            |
| Tmin,Tmax      | 0.715,0.795                               | 0.724,0.803                     |
| Tmin'          | 0.701                                     |                                 |

Correction method= MULTI-SCAN

Data completeness= 1.000 Theta(max)= 27.500

R(reflections)= 0.0902( 3965) wR2(reflections)= 0.2622( 5910)

S = 1.037 Npar= 290

---

The following ALERTS were generated. Each ALERT has the format  
test-name\_ALERT\_alert-type\_alert-level.  
Click on the hyperlinks for more details of the test.

---

### Alert level B

PLAT201\_ALERT\_2\_B Isotropic non-H Atoms in Main Residue(s) .....

---

## ● Alert level C

ABSTY02\_ALERT\_1\_C An \_exptl\_absorpt\_correction\_type has been given without  
a literature citation. This should be contained in the  
\_exptl\_absorpt\_process\_details field.  
Absorption correction given as multi-scan

RFACR01\_ALERT\_3\_C The value of the weighted R factor is > 0.25  
Weighted R factor given 0.262

PLAT084\_ALERT\_2\_C High wR2 Value ..... 0.26  
PLAT094\_ALERT\_2\_C Ratio of Maximum / Minimum Residual Density .... 2.01  
PLAT202\_ALERT\_3\_C Isotropic non-H Atoms in Anion/Solvent ..... 1  
PLAT241\_ALERT\_2\_C Check High Ueq as Compared to Neighbors for N3  
PLAT244\_ALERT\_4\_C Low 'Solvent' Ueq as Compared to Neighbors of P1  
PLAT303\_ALERT\_2\_C Full Occupancy H-Atom H21A with # Connections 2  
PLAT341\_ALERT\_3\_C Low Bond Precision on C-C Bonds (x 1000) Ang .. 13  
PLAT360\_ALERT\_2\_C Short C(sp3)-C(sp3) Bond C45 - C46 ... 1.35 Ang.  
PLAT366\_ALERT\_2\_C Short? C(sp?)-C(sp?) Bond C33 - C34 ... 1.38 Ang.

---

## ● Alert level G

PLAT072\_ALERT\_2\_G SHELXL First Parameter in WGHT Unusually Large. 0.13  
PLAT083\_ALERT\_2\_G SHELXL Second Parameter in WGHT Unusually Large. 31.93  
PLAT242\_ALERT\_2\_G Check Low Ueq as Compared to Neighbors for C2  
PLAT301\_ALERT\_3\_G Note: Main Residue Disorder ..... 86 Perc.  
PLAT302\_ALERT\_4\_G Note: Anion/Solvent Disorder ..... 33 Perc.  
PLAT432\_ALERT\_2\_G Short Inter X...Y Contact C12 .. C13 .. 3.12 Ang.  
PLAT432\_ALERT\_2\_G Short Inter X...Y Contact C12 .. C14 .. 3.15 Ang.  
PLAT764\_ALERT\_4\_G Overcomplete CIF Bond List Detected (Rep/Expd) . 2.50 Ratio  
PLAT773\_ALERT\_2\_G Check long C-C Bond in CIF: C3 -- C41 . 1.76 Ang.  
PLAT773\_ALERT\_2\_G Check long C-C Bond in CIF: C3 -- C42 . 1.90 Ang.  
PLAT773\_ALERT\_2\_G Check long C-C Bond in CIF: C5 -- C39 . 1.72 Ang.  
PLAT773\_ALERT\_2\_G Check long C-C Bond in CIF: C8 -- C9 . 1.72 Ang.  
PLAT773\_ALERT\_2\_G Check long C-C Bond in CIF: C9 -- C8 . 1.72 Ang.  
PLAT773\_ALERT\_2\_G Check long C-C Bond in CIF: C14 -- C15 . 1.85 Ang.  
PLAT773\_ALERT\_2\_G Check long C-C Bond in CIF: C15 -- C14 . 1.85 Ang.  
PLAT773\_ALERT\_2\_G Check long C-C Bond in CIF: C21 -- C21 . 1.74 Ang.  
PLAT773\_ALERT\_2\_G Check long C-C Bond in CIF: C30 -- C36 . 1.83 Ang.  
PLAT773\_ALERT\_2\_G Check long C-C Bond in CIF: C36 -- C30 . 1.83 Ang.  
PLAT773\_ALERT\_2\_G Check long C-C Bond in CIF: C39 -- C5 . 1.72 Ang.  
PLAT773\_ALERT\_2\_G Check long C-C Bond in CIF: C41 -- C3 . 1.76 Ang.  
PLAT773\_ALERT\_2\_G Check long C-C Bond in CIF: C42 -- C3 . 1.90 Ang.  
PLAT779\_ALERT\_4\_G Suspect or Irrelevant (Bond) Angle in CIF .... # 69  
C8 -N1 -C8 1.555 1.555 6.555 30.70 Deg.  
PLAT779\_ALERT\_4\_G Suspect or Irrelevant (Bond) Angle in CIF .... # 82  
C8 -N2 -C8 1.555 1.555 6.555 34.20 Deg.  
PLAT779\_ALERT\_4\_G Suspect or Irrelevant (Bond) Angle in CIF .... # 88  
C15 -N3 -C15 1.555 1.555 6.555 44.40 Deg.  
PLAT779\_ALERT\_4\_G Suspect or Irrelevant (Bond) Angle in CIF .... # 98  
C15 -N4 -C15 1.555 1.555 6.555 37.50 Deg.  
PLAT779\_ALERT\_4\_G Suspect or Irrelevant (Bond) Angle in CIF .... # 114  
C30 -N5 -C37 1.555 1.555 2.555 32.30 Deg.  
PLAT779\_ALERT\_4\_G Suspect or Irrelevant (Bond) Angle in CIF .... # 126  
C30 -N6 -C37 1.555 1.555 2.555 37.50 Deg.  
PLAT779\_ALERT\_4\_G Suspect or Irrelevant (Bond) Angle in CIF .... # 137  
C37 -N7 -C30 1.555 1.555 2.555 39.80 Deg.  
PLAT779\_ALERT\_4\_G Suspect or Irrelevant (Bond) Angle in CIF .... # 146  
C37 -N8 -C30 1.555 1.555 2.555 35.40 Deg.  
PLAT779\_ALERT\_4\_G Suspect or Irrelevant (Bond) Angle in CIF .... # 159  
O1 -C1 -O4 1.555 1.555 5.555 19.80 Deg.  
PLAT779\_ALERT\_4\_G Suspect or Irrelevant (Bond) Angle in CIF .... # 167  
C40 -C2 -C7 5.555 1.555 1.555 20.90 Deg.  
PLAT779\_ALERT\_4\_G Suspect or Irrelevant (Bond) Angle in CIF .... # 172

|                   |         |      |            |        |       |       |     |       |      |
|-------------------|---------|------|------------|--------|-------|-------|-----|-------|------|
|                   | 01      | -C2  | -04        | 1.555  | 1.555 | 5.555 |     | 19.90 | Deg. |
| PLAT779_ALERT_4_G | Suspect | or   | Irrelevant | (Bond) | Angle | in    | CIF | ....  | #    |
|                   | C2      | -C3  | -C41       | 1.555  | 1.555 | 5.555 |     | 14.00 | Deg. |
| PLAT779_ALERT_4_G | Suspect | or   | Irrelevant | (Bond) | Angle | in    | CIF | ....  | #    |
|                   | C41     | -C3  | -C42       | 5.555  | 1.555 | 5.555 |     | 43.20 | Deg. |
| PLAT779_ALERT_4_G | Suspect | or   | Irrelevant | (Bond) | Angle | in    | CIF | ....  | #    |
|                   | C6      | -C5  | -C39       | 1.555  | 1.555 | 5.555 |     | 5.30  | Deg. |
| PLAT779_ALERT_4_G | Suspect | or   | Irrelevant | (Bond) | Angle | in    | CIF | ....  | #    |
|                   | C39     | -C6  | -C7        | 5.555  | 1.555 | 1.555 |     | 38.00 | Deg. |
| PLAT779_ALERT_4_G | Suspect | or   | Irrelevant | (Bond) | Angle | in    | CIF | ....  | #    |
|                   | C7      | -C6  | -C40       | 1.555  | 1.555 | 5.555 |     | 19.20 | Deg. |
| PLAT779_ALERT_4_G | Suspect | or   | Irrelevant | (Bond) | Angle | in    | CIF | ....  | #    |
|                   | C41     | -C7  | -C2        | 5.555  | 1.555 | 1.555 |     | 22.00 | Deg. |
| PLAT779_ALERT_4_G | Suspect | or   | Irrelevant | (Bond) | Angle | in    | CIF | ....  | #    |
|                   | C39     | -C7  | -C6        | 5.555  | 1.555 | 1.555 |     | 11.70 | Deg. |
| PLAT779_ALERT_4_G | Suspect | or   | Irrelevant | (Bond) | Angle | in    | CIF | ....  | #    |
|                   | N1      | -C8  | -N1        | 1.555  | 1.555 | 6.555 |     | 40.60 | Deg. |
| PLAT779_ALERT_4_G | Suspect | or   | Irrelevant | (Bond) | Angle | in    | CIF | ....  | #    |
|                   | C9      | -C8  | -C9        | 1.555  | 1.555 | 6.555 |     | 37.30 | Deg. |
| PLAT779_ALERT_4_G | Suspect | or   | Irrelevant | (Bond) | Angle | in    | CIF | ....  | #    |
|                   | C10     | -C9  | -C10       | 1.555  | 1.555 | 6.555 |     | 21.20 | Deg. |
| PLAT779_ALERT_4_G | Suspect | or   | Irrelevant | (Bond) | Angle | in    | CIF | ....  | #    |
|                   | C8      | -C9  | -C8        | 1.555  | 1.555 | 6.555 |     | 28.70 | Deg. |
| PLAT779_ALERT_4_G | Suspect | or   | Irrelevant | (Bond) | Angle | in    | CIF | ....  | #    |
|                   | C9      | -C10 | -C9        | 1.555  | 1.555 | 6.555 |     | 41.80 | Deg. |
| PLAT779_ALERT_4_G | Suspect | or   | Irrelevant | (Bond) | Angle | in    | CIF | ....  | #    |
|                   | C10     | -C11 | -C10       | 1.555  | 1.555 | 6.555 |     | 23.10 | Deg. |
| PLAT779_ALERT_4_G | Suspect | or   | Irrelevant | (Bond) | Angle | in    | CIF | ....  | #    |
|                   | C13     | -C11 | -C13       | 1.555  | 1.555 | 6.555 |     | 29.40 | Deg. |
| PLAT779_ALERT_4_G | Suspect | or   | Irrelevant | (Bond) | Angle | in    | CIF | ....  | #    |
|                   | C13     | -C14 | -C13       | 1.555  | 1.555 | 6.555 |     | 25.60 | Deg. |
| PLAT779_ALERT_4_G | Suspect | or   | Irrelevant | (Bond) | Angle | in    | CIF | ....  | #    |
|                   | C15     | -C14 | -C15       | 1.555  | 1.555 | 6.555 |     | 36.10 | Deg. |
| PLAT779_ALERT_4_G | Suspect | or   | Irrelevant | (Bond) | Angle | in    | CIF | ....  | #    |
|                   | C14     | -C15 | -C14       | 1.555  | 1.555 | 6.555 |     | 44.50 | Deg. |
| PLAT779_ALERT_4_G | Suspect | or   | Irrelevant | (Bond) | Angle | in    | CIF | ....  | #    |
|                   | C26     | -C16 | -C17       | 2.555  | 1.555 | 1.555 |     | 10.20 | Deg. |
| PLAT779_ALERT_4_G | Suspect | or   | Irrelevant | (Bond) | Angle | in    | CIF | ....  | #    |
|                   | C18     | -C17 | -C25       | 1.555  | 1.555 | 2.555 |     | 28.30 | Deg. |
| PLAT779_ALERT_4_G | Suspect | or   | Irrelevant | (Bond) | Angle | in    | CIF | ....  | #    |
|                   | C26     | -C17 | -C16       | 2.555  | 1.555 | 1.555 |     | 40.00 | Deg. |
| PLAT779_ALERT_4_G | Suspect | or   | Irrelevant | (Bond) | Angle | in    | CIF | ....  | #    |
|                   | C24     | -C18 | -C19       | 2.555  | 1.555 | 1.555 |     | 16.40 | Deg. |
| PLAT779_ALERT_4_G | Suspect | or   | Irrelevant | (Bond) | Angle | in    | CIF | ....  | #    |
|                   | C17     | -C18 | -C26       | 1.555  | 1.555 | 2.555 |     | 12.20 | Deg. |
| PLAT779_ALERT_4_G | Suspect | or   | Irrelevant | (Bond) | Angle | in    | CIF | ....  | #    |
|                   | C25     | -C19 | -C18       | 2.555  | 1.555 | 1.555 |     | 27.80 | Deg. |
| PLAT779_ALERT_4_G | Suspect | or   | Irrelevant | (Bond) | Angle | in    | CIF | ....  | #    |
|                   | O3      | -C19 | -O2        | 2.555  | 1.555 | 1.555 |     | 26.20 | Deg. |
| PLAT779_ALERT_4_G | Suspect | or   | Irrelevant | (Bond) | Angle | in    | CIF | ....  | #    |
|                   | C19     | -C20 | -C24       | 1.555  | 1.555 | 2.555 |     | 14.10 | Deg. |
| PLAT779_ALERT_4_G | Suspect | or   | Irrelevant | (Bond) | Angle | in    | CIF | ....  | #    |
|                   | O2      | -C22 | -O3        | 1.555  | 1.555 | 2.555 |     | 25.20 | Deg. |
| PLAT779_ALERT_4_G | Suspect | or   | Irrelevant | (Bond) | Angle | in    | CIF | ....  | #    |
|                   | O3      | -C23 | -O2        | 1.555  | 1.555 | 2.555 |     | 26.70 | Deg. |
| PLAT779_ALERT_4_G | Suspect | or   | Irrelevant | (Bond) | Angle | in    | CIF | ....  | #    |
|                   | O2      | -C24 | -O3        | 2.555  | 1.555 | 1.555 |     | 27.80 | Deg. |
| PLAT779_ALERT_4_G | Suspect | or   | Irrelevant | (Bond) | Angle | in    | CIF | ....  | #    |
|                   | C18     | -C24 | -C25       | 2.555  | 1.555 | 1.555 |     | 27.20 | Deg. |
| PLAT779_ALERT_4_G | Suspect | or   | Irrelevant | (Bond) | Angle | in    | CIF | ....  | #    |
|                   | C17     | -C25 | -C26       | 2.555  | 1.555 | 1.555 |     | 14.00 | Deg. |
| PLAT779_ALERT_4_G | Suspect | or   | Irrelevant | (Bond) | Angle | in    | CIF | ....  | #    |

|                   |         |      |            |        |       |       |       |            |
|-------------------|---------|------|------------|--------|-------|-------|-------|------------|
|                   | C19     | -C25 | -C24       | 2.555  | 1.555 | 1.555 | 15.70 | Deg.       |
| PLAT779_ALERT_4_G | Suspect | or   | Irrelevant | (Bond) | Angle | in    | CIF   | .... # 401 |
|                   | C25     | -C26 | -C18       | 1.555  | 1.555 | 2.555 | 26.50 | Deg.       |
| PLAT779_ALERT_4_G | Suspect | or   | Irrelevant | (Bond) | Angle | in    | CIF   | .... # 406 |
|                   | C17     | -C27 | -C26       | 2.555  | 1.555 | 1.555 | 14.10 | Deg.       |
| PLAT779_ALERT_4_G | Suspect | or   | Irrelevant | (Bond) | Angle | in    | CIF   | .... # 418 |
|                   | C24     | -C29 | -C19       | 1.555  | 1.555 | 2.555 | 14.00 | Deg.       |
| PLAT779_ALERT_4_G | Suspect | or   | Irrelevant | (Bond) | Angle | in    | CIF   | .... # 429 |
|                   | N6      | -C30 | -N7        | 1.555  | 1.555 | 2.555 | 15.80 | Deg.       |
| PLAT779_ALERT_4_G | Suspect | or   | Irrelevant | (Bond) | Angle | in    | CIF   | .... # 439 |
|                   | C31     | -C30 | -C36       | 1.555  | 1.555 | 2.555 | 34.40 | Deg.       |
| PLAT779_ALERT_4_G | Suspect | or   | Irrelevant | (Bond) | Angle | in    | CIF   | .... # 446 |
|                   | C32     | -C31 | -C35       | 1.555  | 1.555 | 2.555 | 20.10 | Deg.       |
| PLAT779_ALERT_4_G | Suspect | or   | Irrelevant | (Bond) | Angle | in    | CIF   | .... # 450 |
|                   | C30     | -C31 | -C37       | 1.555  | 1.555 | 2.555 | 35.80 | Deg.       |
| PLAT779_ALERT_4_G | Suspect | or   | Irrelevant | (Bond) | Angle | in    | CIF   | .... # 456 |
|                   | C31     | -C32 | -C36       | 1.555  | 1.555 | 2.555 | 42.30 | Deg.       |
| PLAT779_ALERT_4_G | Suspect | or   | Irrelevant | (Bond) | Angle | in    | CIF   | .... # 462 |
|                   | C32     | -C33 | -C35       | 2.555  | 1.555 | 1.555 | 22.70 | Deg.       |
| PLAT779_ALERT_4_G | Suspect | or   | Irrelevant | (Bond) | Angle | in    | CIF   | .... # 466 |
|                   | C32     | -C33 | -C35       | 1.555  | 1.555 | 2.555 | 22.70 | Deg.       |
| PLAT779_ALERT_4_G | Suspect | or   | Irrelevant | (Bond) | Angle | in    | CIF   | .... # 471 |
|                   | N7      | -C34 | -N6        | 1.555  | 1.555 | 2.555 | 16.20 | Deg.       |
| PLAT779_ALERT_4_G | Suspect | or   | Irrelevant | (Bond) | Angle | in    | CIF   | .... # 475 |
|                   | N7      | -C34 | -N6        | 2.555  | 1.555 | 1.555 | 16.20 | Deg.       |
| PLAT779_ALERT_4_G | Suspect | or   | Irrelevant | (Bond) | Angle | in    | CIF   | .... # 482 |
|                   | C36     | -C35 | -C31       | 1.555  | 1.555 | 2.555 | 40.30 | Deg.       |
| PLAT779_ALERT_4_G | Suspect | or   | Irrelevant | (Bond) | Angle | in    | CIF   | .... # 488 |
|                   | C35     | -C36 | -C32       | 1.555  | 1.555 | 2.555 | 22.10 | Deg.       |
| PLAT779_ALERT_4_G | Suspect | or   | Irrelevant | (Bond) | Angle | in    | CIF   | .... # 492 |
|                   | C37     | -C36 | -C30       | 1.555  | 1.555 | 2.555 | 31.20 | Deg.       |
| PLAT779_ALERT_4_G | Suspect | or   | Irrelevant | (Bond) | Angle | in    | CIF   | .... # 502 |
|                   | N7      | -C37 | -N6        | 1.555  | 1.555 | 2.555 | 13.50 | Deg.       |
| PLAT779_ALERT_4_G | Suspect | or   | Irrelevant | (Bond) | Angle | in    | CIF   | .... # 507 |
|                   | C36     | -C37 | -C31       | 1.555  | 1.555 | 2.555 | 39.00 | Deg.       |
| PLAT779_ALERT_4_G | Suspect | or   | Irrelevant | (Bond) | Angle | in    | CIF   | .... # 510 |
|                   | N8      | -C37 | -N5        | 1.555  | 1.555 | 2.555 | 44.00 | Deg.       |
| PLAT779_ALERT_4_G | Suspect | or   | Irrelevant | (Bond) | Angle | in    | CIF   | .... # 515 |
|                   | C6      | -C38 | -C39       | 5.555  | 1.555 | 1.555 | 16.50 | Deg.       |
| PLAT779_ALERT_4_G | Suspect | or   | Irrelevant | (Bond) | Angle | in    | CIF   | .... # 529 |
|                   | C7      | -C39 | -C40       | 5.555  | 1.555 | 1.555 | 21.40 | Deg.       |
| PLAT779_ALERT_4_G | Suspect | or   | Irrelevant | (Bond) | Angle | in    | CIF   | .... # 531 |
|                   | C6      | -C39 | -C5        | 5.555  | 1.555 | 5.555 | 19.00 | Deg.       |
| PLAT779_ALERT_4_G | Suspect | or   | Irrelevant | (Bond) | Angle | in    | CIF   | .... # 537 |
|                   | C2      | -C40 | -C41       | 5.555  | 1.555 | 1.555 | 23.10 | Deg.       |
| PLAT779_ALERT_4_G | Suspect | or   | Irrelevant | (Bond) | Angle | in    | CIF   | .... # 544 |
|                   | C39     | -C40 | -C6        | 1.555  | 1.555 | 5.555 | 13.00 | Deg.       |
| PLAT779_ALERT_4_G | Suspect | or   | Irrelevant | (Bond) | Angle | in    | CIF   | .... # 554 |
|                   | C40     | -C41 | -C7        | 1.555  | 1.555 | 5.555 | 21.90 | Deg.       |
| PLAT779_ALERT_4_G | Suspect | or   | Irrelevant | (Bond) | Angle | in    | CIF   | .... # 556 |
|                   | O4      | -C41 | -O1        | 1.555  | 1.555 | 5.555 | 20.80 | Deg.       |
| PLAT779_ALERT_4_G | Suspect | or   | Irrelevant | (Bond) | Angle | in    | CIF   | .... # 560 |
|                   | C2      | -C41 | -C3        | 5.555  | 1.555 | 5.555 | 39.00 | Deg.       |
| PLAT779_ALERT_4_G | Suspect | or   | Irrelevant | (Bond) | Angle | in    | CIF   | .... # 567 |
|                   | C41     | -C42 | -C2        | 1.555  | 1.555 | 5.555 | 17.60 | Deg.       |
| PLAT779_ALERT_4_G | Suspect | or   | Irrelevant | (Bond) | Angle | in    | CIF   | .... # 577 |
|                   | O1      | -C44 | -O4        | 5.555  | 1.555 | 1.555 | 17.50 | Deg.       |
| PLAT779_ALERT_4_G | Suspect | or   | Irrelevant | (Bond) | Angle | in    | CIF   | .... # 583 |
|                   | C2      | -O1  | -C41       | 1.555  | 1.555 | 5.555 | 22.20 | Deg.       |
| PLAT779_ALERT_4_G | Suspect | or   | Irrelevant | (Bond) | Angle | in    | CIF   | .... # 585 |
|                   | C44     | -O1  | -C1        | 5.555  | 1.555 | 1.555 | 22.30 | Deg.       |
| PLAT779_ALERT_4_G | Suspect | or   | Irrelevant | (Bond) | Angle | in    | CIF   | .... # 593 |

|                   |                       |                   |                  |        |       |               |            |
|-------------------|-----------------------|-------------------|------------------|--------|-------|---------------|------------|
|                   | C23                   | -O2               | -C22             | 2.555  | 1.555 | 1.555         | 19.50 Deg. |
| PLAT779_ALERT_4_G | Suspect               | or                | Irrelevant       | (Bond) | Angle | in CIF .... # | 595        |
|                   | C24                   | -O2               | -C19             | 2.555  | 1.555 | 1.555         | 15.40 Deg. |
| PLAT779_ALERT_4_G | Suspect               | or                | Irrelevant       | (Bond) | Angle | in CIF .... # | 603        |
|                   | C19                   | -O3               | -C24             | 2.555  | 1.555 | 1.555         | 17.00 Deg. |
| PLAT779_ALERT_4_G | Suspect               | or                | Irrelevant       | (Bond) | Angle | in CIF .... # | 605        |
|                   | C23                   | -O3               | -C22             | 1.555  | 1.555 | 2.555         | 18.00 Deg. |
| PLAT779_ALERT_4_G | Suspect               | or                | Irrelevant       | (Bond) | Angle | in CIF .... # | 612        |
|                   | C41                   | -O4               | -C2              | 1.555  | 1.555 | 5.555         | 21.30 Deg. |
| PLAT779_ALERT_4_G | Suspect               | or                | Irrelevant       | (Bond) | Angle | in CIF .... # | 616        |
|                   | C1                    | -O4               | -C44             | 5.555  | 1.555 | 1.555         | 20.00 Deg. |
| PLAT779_ALERT_4_G | Suspect               | or                | Irrelevant       | (Bond) | Angle | in CIF .... # | 637        |
|                   | F2                    | -P1               | -F3              | 1.555  | 1.555 | 6.555         | 40.50 Deg. |
| PLAT779_ALERT_4_G | Suspect               | or                | Irrelevant       | (Bond) | Angle | in CIF .... # | 643        |
|                   | F2                    | -P1               | -F3              | 1.555  | 1.555 | 5.456         | 40.50 Deg. |
| PLAT779_ALERT_4_G | Suspect               | or                | Irrelevant       | (Bond) | Angle | in CIF .... # | 651        |
|                   | F2                    | -P1               | -F3              | 5.456  | 1.555 | 1.555         | 40.50 Deg. |
| PLAT779_ALERT_4_G | Suspect               | or                | Irrelevant       | (Bond) | Angle | in CIF .... # | 659        |
|                   | F2                    | -P1               | -F3              | 5.456  | 1.555 | 2.456         | 40.50 Deg. |
| PLAT790_ALERT_4_G | Centre of Gravity not | Within            | Unit Cell: Resd. | #      |       |               | 2          |
|                   | F6                    | P                 |                  |        |       |               |            |
| PLAT790_ALERT_4_G | Centre of Gravity not | Within            | Unit Cell: Resd. | #      |       |               | 3          |
|                   | C2                    | H3                | C13              |        |       |               |            |
| PLAT811_ALERT_5_G | No ADDSYM Analysis:   | Too Many Excluded | Atoms ....       |        |       |               | !          |

---

0 **ALERT level A** = Most likely a serious problem - resolve or explain  
 1 **ALERT level B** = A potentially serious problem, consider carefully  
 11 **ALERT level C** = Check. Ensure it is not caused by an omission or oversight  
 106 **ALERT level G** = General information/check it is not something unexpected

1 ALERT type 1 CIF construction/syntax error, inconsistent or missing data  
 25 ALERT type 2 Indicator that the structure model may be wrong or deficient  
 4 ALERT type 3 Indicator that the structure quality may be low  
 87 ALERT type 4 Improvement, methodology, query or suggestion  
 1 ALERT type 5 Informative message, check

---

It is advisable to attempt to resolve as many as possible of the alerts in all categories. Often the minor alerts point to easily fixed oversights, errors and omissions in your CIF or refinement strategy, so attention to these fine details can be worthwhile. In order to resolve some of the more serious problems it may be necessary to carry out additional measurements or structure refinements. However, the purpose of your study may justify the reported deviations and the more serious of these should normally be commented upon in the discussion or experimental section of a paper or in the "special\_details" fields of the CIF. checkCIF was carefully designed to identify outliers and unusual parameters, but every test has its limitations and alerts that are not important in a particular case may appear. Conversely, the absence of alerts does not guarantee there are no aspects of the results needing attention. It is up to the individual to critically assess their own results and, if necessary, seek expert advice.

#### Publication of your CIF in IUCr journals

A basic structural check has been run on your CIF. These basic checks will be run on all CIFs submitted for publication in IUCr journals (*Acta Crystallographica*, *Journal of Applied Crystallography*, *Journal of Synchrotron Radiation*); however, if you intend to submit to *Acta Crystallographica Section C* or *E*, you should make sure that full publication checks are run on the final version of your CIF prior to submission.

#### Publication of your CIF in other journals

Please refer to the *Notes for Authors* of the relevant journal for any special instructions relating to CIF submission.

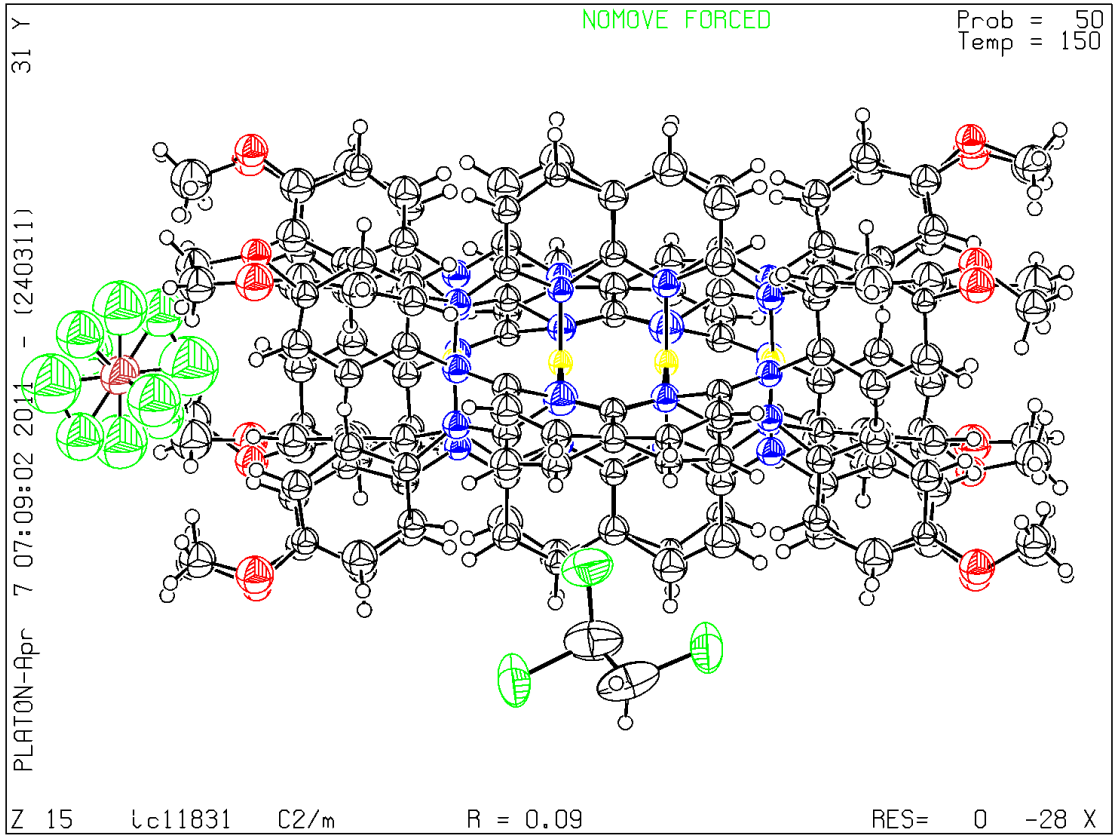

Supplement: mmc2 [file mmc2.pdf]
